# Supplementary material
Source: publisher figshare collection journal article supplement (https://acs.figshare.com/ndownloader/files/5086708)
Supplement: Supplementary file 1 [file 5086708]

Supporting Information

## Comparative Virtual and Experimental High-Throughput Screening for Glycogen Synthase Kinase-3 $\beta$ Inhibitors

Tímea Polgár, Andrea Baki, Györgyi I. Szendrei and György M. Keserű\*

## Brief description of the assays used for checking promiscuous inhibitors

### Asp protease assay

Inhibition of the  $\beta$ -secretase activity was measured by PanVera's BACE fluorescence resonance energy transfer assay kit as described in the protocol ([www.invitrogen.com/content/sfs/panvera/L0724.pdf](http://www.invitrogen.com/content/sfs/panvera/L0724.pdf)).

### Glu receptor assay

Inhibition of an undisclosed metabotropic Glu receptor activity was measured in a radioligand binding assay using native rat cortical membranes. The principle of the assay is similar to that reported by Takeuchi et al. (*Z. Naturforsch.* **2001**, 57c, 348-355).

### Peptidergic GPCR assay

Inhibition of an undisclosed peptidergic GPCR activity was measured in an intracellular  $\text{Ca}^{2+}$  assay using CHO cells stably expressing the target. The principle of the assay is similar to that reported by Simpson et al. (*Eur. J. Pharmacol.* **2000**, 392, 1-9).

#### Figure S1

The relationship between luminescent signal measured (RLU: relative light units) and the ATP concentration in the reaction buffer. The correlation coefficient ( $R^2$ ) is 0.9997. Serial dilutions of ATP: 0.003; 0.01; 0.03; 0.1; 0.3; 1; 3  $\mu$ M. Luminescence was recorded 10 minutes (■), 20 minutes (●) and 100 minutes (▲) after adding the Kinase-Glo™ reagent.

#### Figure S2

ATP-luminescence standard curve. Concentrations of ATP: 0.06; 0.1; 0.3; 0.6; 1  $\mu$ M, in the excess of substrate, 20 ng GSK-3 $\beta$  in final volume of 40  $\mu$ l (30°C and 30 minutes). Control samples were measured in the same reaction mixture and under the same reaction conditions containing no GSK-3 $\beta$ . Measurements in the presence ● and in the absence ■ GSK-3 $\beta$ .

#### Figure S3

Determining the optimal substrate concentration. Substrate concentrations: 1; 5; 25; 50; 100; 200  $\mu$ M. The blank samples contained the same amount of substrate and ATP without GSK-3 $\beta$ .  $\Delta\text{RLU} = |\text{RLU}_{\text{enzyme}} - \text{RLU}_{\text{blank}}|$

#### Figure S4

The optimal GSK-3 $\beta$  concentration was determined in the presence of 1  $\mu$ M ATP and 25  $\mu$ M substrate. The enzyme concentration was 2; 5; 10; 20; 40 ng. The blank values contain the same amount of ATP and substrate without GSK-3 $\beta$ .  $\Delta\text{RLU} = |\text{RLU}_{\text{enzyme}} - \text{RLU}_{\text{blank}}|$

#### Table S1

Inhibition% of GSK-3 $\beta$  hits (as measured at concentration indicated in parenthesis) in three different assay systems

#### Table S2

Enrichment factors calculated at 1, 2, 5 and 10% of the ranked database for enrichment studies and virtual screening of the corporate sublibrary

Figure S1

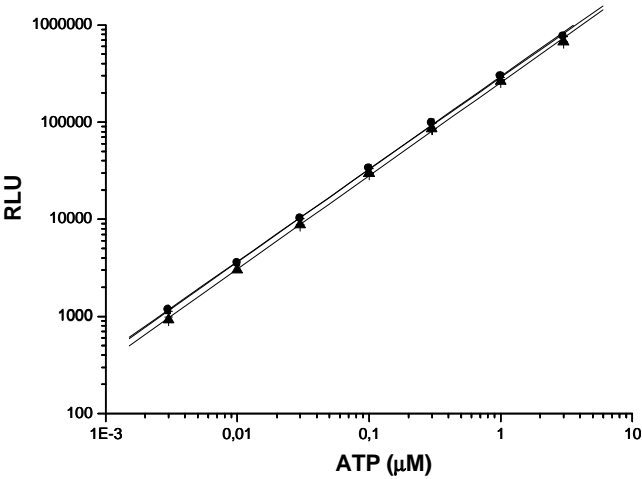

Figure S2

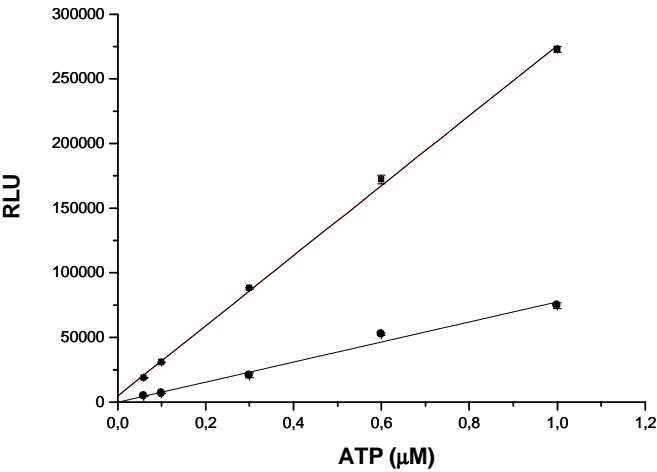

Figure S3

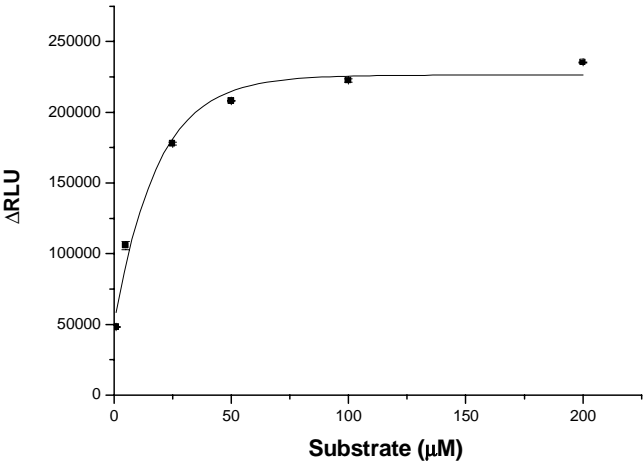

Figure S4

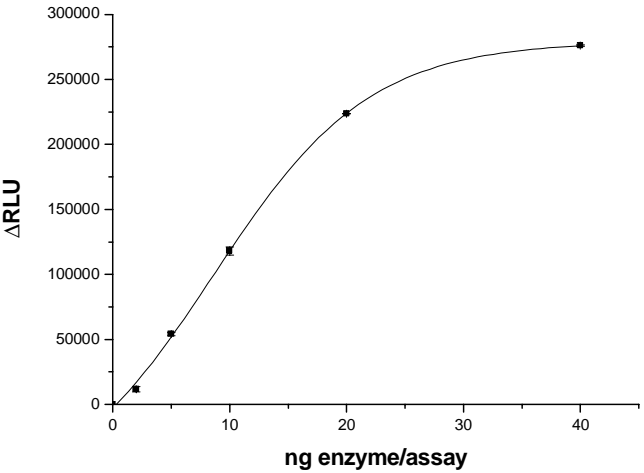

Table S1

|             | Inhibition %              |                           |                              |
|-------------|---------------------------|---------------------------|------------------------------|
|             | Asp protease (30 $\mu$ M) | Glu receptor (10 $\mu$ M) | Peptidergic GPCR (5 $\mu$ M) |
| Compound 1  | 33                        | < 30                      | < 30                         |
| Compound 2  | < 30                      | 56                        | < 30                         |
| Compound 3  | < 30                      | < 30                      | < 30                         |
| Compound 4  | < 30                      | < 30                      | < 30                         |
| Compound 5  | < 30                      | < 30                      | < 30                         |
| Compound 6  | < 30                      | < 30                      | < 30                         |
| Compound 7  | < 30                      | < 30                      | < 30                         |
| Compound 8  | < 30                      | < 30                      | < 30                         |
| Compound 9  | < 30                      | < 30                      | < 30                         |
| Compound 10 | < 30                      | < 30                      | < 30                         |
| Compound 11 | < 30                      | < 30                      | < 30                         |
| Compound 12 | < 30                      | < 30                      | < 30                         |
| Compound 13 | < 30                      | < 30                      | < 30                         |
| Compound 14 | < 30                      | < 30                      | < 30                         |
| Compound 15 | < 30                      | < 30                      | < 30                         |
| Compound 16 | < 30                      | < 30                      | < 30                         |
| Compound 17 | < 30                      | < 30                      | < 30                         |
| Compound 18 | < 30                      | < 30                      | < 30                         |
| Compound 19 | < 30                      | < 30                      | 70                           |
| Compound 20 | < 30                      | 34                        | < 30                         |
| Compound 21 | < 30                      | < 30                      | < 30                         |

|             |      |      |      |
|-------------|------|------|------|
| Compound 22 | < 30 | 47   | < 30 |
| Compound 23 | < 30 | 44   | < 30 |
| Compound 24 | < 30 | < 30 | < 30 |
| Compound 25 | < 30 | < 30 | < 30 |
| Compound 26 | 104  | 44   | < 30 |
| Compound 27 | < 30 | < 30 | < 30 |
| Compound 28 | < 30 | < 30 | < 30 |
| Compound 29 | < 30 | < 30 | < 30 |
| Compound 30 | < 30 | < 30 | < 30 |
| Compound 31 | < 30 | < 30 | < 30 |
| Compound 32 | < 30 | < 30 | < 30 |
| Compound 33 | < 30 | < 30 | < 30 |
| Compound 34 | < 30 | < 30 | < 30 |
| Compound 35 | 57   | < 30 | < 30 |
| Compound 36 | < 30 | < 30 | < 30 |
| Compound 37 | < 30 | 42   | < 30 |
| Compound 38 | < 30 | < 30 | < 30 |
| Compound 39 | < 30 | < 30 | < 30 |
| Compound 40 | < 30 | 42   | < 30 |
| Compound 41 | < 30 | < 30 | < 30 |
| Compound 42 | < 30 | < 30 | < 30 |
| Compound 43 | < 30 | < 30 | < 30 |
| Compound 44 | < 30 | < 30 | < 30 |
| Compound 45 | < 30 | < 30 | < 30 |
| Compound 46 | < 30 | < 30 | < 30 |

|             |      |      |      |
|-------------|------|------|------|
| Compound 47 | < 30 | < 30 | < 30 |
| Compound 48 | 32   | < 30 | < 30 |
| Compound 49 | < 30 | 32   | < 30 |
| Compound 50 | < 30 | 33   | < 30 |
| Compound 51 | < 30 | 25   | < 30 |
| Compound 52 | < 30 | < 30 | < 30 |
| Compound 53 | < 30 | < 30 | < 30 |
| Compound 54 | < 30 | < 30 | < 30 |
| Compound 55 | < 30 | < 30 | < 30 |
| Compound 56 | < 30 | < 30 | < 30 |
| Compound 57 | 58   | < 30 | < 30 |
| Compound 58 | < 30 | 60   | < 30 |
| Compound 59 | < 30 | < 30 | < 30 |
| Compound 60 | < 30 | < 30 | < 30 |
| Compound 61 | < 30 | < 30 | < 30 |
| Compound 62 | N/A  | < 30 | < 30 |
| Compound 63 | N/A  | < 30 | < 30 |
| Compound 64 | < 30 | < 30 | < 30 |
| Compound 65 | < 30 | < 30 | < 30 |
| Compound 66 | < 30 | < 30 | < 30 |
| Compound 67 | < 30 | < 30 | < 30 |
| Compound 68 | < 30 | < 30 | 77   |
| Compound 69 | < 30 | < 30 | 76   |
| Compound 70 | < 30 | < 30 | < 30 |
| Compound 71 | < 30 | < 30 | < 30 |



|             |      |      |      |
|-------------|------|------|------|
| Compound 72 | < 30 | < 30 | < 30 |
| Compound 73 | N/A  | < 30 | < 30 |
| Compound 74 | < 30 | < 30 | < 30 |
| Compound 75 | < 30 | < 30 | < 30 |
| Compound 76 | < 30 | < 30 | < 30 |
| Compound 77 | < 30 | < 30 | < 30 |
| Compound 78 | < 30 | < 30 | < 30 |
| Compound 79 | < 30 | < 30 | < 30 |
| Compound 80 | < 30 | < 30 | < 30 |
| Compound 81 | < 30 | < 30 | < 30 |
| Compound 82 | < 30 | < 30 | < 30 |
| Compound 83 | < 30 | < 30 | < 30 |
| Compound 84 | < 30 | < 30 | < 30 |
| Compound 85 | < 30 | < 30 | < 30 |
| Compound 86 | < 30 | < 30 | < 30 |
| Compound 87 | < 30 | < 30 | < 30 |
| Compound 88 | < 30 | < 30 | < 30 |
| Compound 89 | < 30 | < 30 | < 30 |
| Compound 90 | < 30 | < 30 | < 30 |

---

Table S2

|      | 1UV5-FlexX |           | 1UV5-Phram |           | 1Q4L-FlexX |           | 1Q4L-Pharm |           |
|------|------------|-----------|------------|-----------|------------|-----------|------------|-----------|
|      | PMF/FlexX  | FlexX/PMF | PMF/FlexX  | FlexX/PMF | PMF/FlexX  | FlexX/PMF | PMF/FlexX  | FlexX/PMF |
| 1 %  | 5          | 5         | 28         | 14        | 9          | 5         | 9          | 21        |
| 2 %  | 11         | 9         | 10.5       | 14        | 4.5        | 4.5       | 5          | 9.5       |
| 5 %  | 6          | 1.5       | 8          | 7.3       | 4          | 2.8       | 6          | 8         |
| 10 % | 4          | 3         | 5          | 5         | 4.5        | 2         | 4.7        | 6.6       |

|      | 1Q3D-FlexX |           | 1Q3D-Phram |           | VS-Pharm  |
|------|------------|-----------|------------|-----------|-----------|
|      | PMF/FlexX  | FlexX/PMF | PMF/FlexX  | FlexX/PMF | PMF/FlexX |
| 1 %  | 5          | 5         | 19         | 14        | 23        |
| 2 %  | 9          | 4.5       | 11.5       | 10        | 11        |
| 5 %  | 6          | 2.5       | 5          | 10        | 5         |
| 10 % | 4          | 2.2       | 3.6        | 10        | 3         |
